# Supplementary material for: Radiosensitizing the SUMO stress response intensifies single-dose radiotherapy tumor cure
Source: JCI journal article supplement (doi:10.1172/jci.insight.153601), 2025-05-22

# Full uncropped gels for Figure 2A

SSR

Actin

Mouse monoclonal  
anti-SUMO2/3  
Anti-mouse HRP

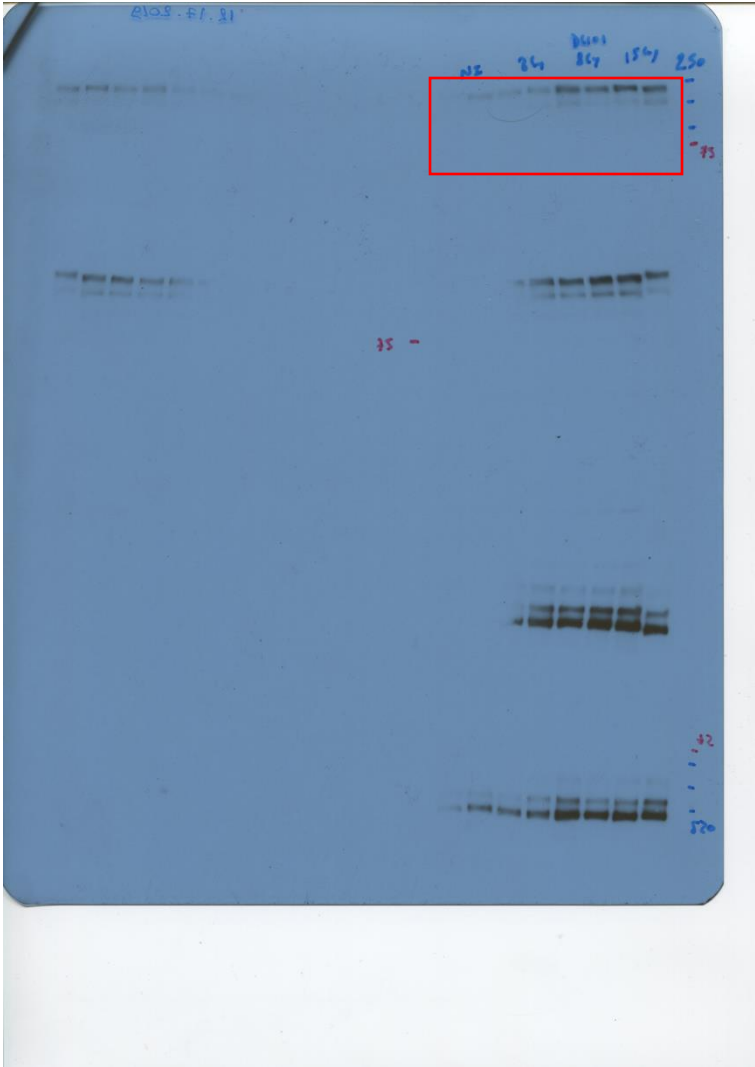

Rabbit polyclonal  
anti- $\beta$ -actin  
anti-rabbit HRP

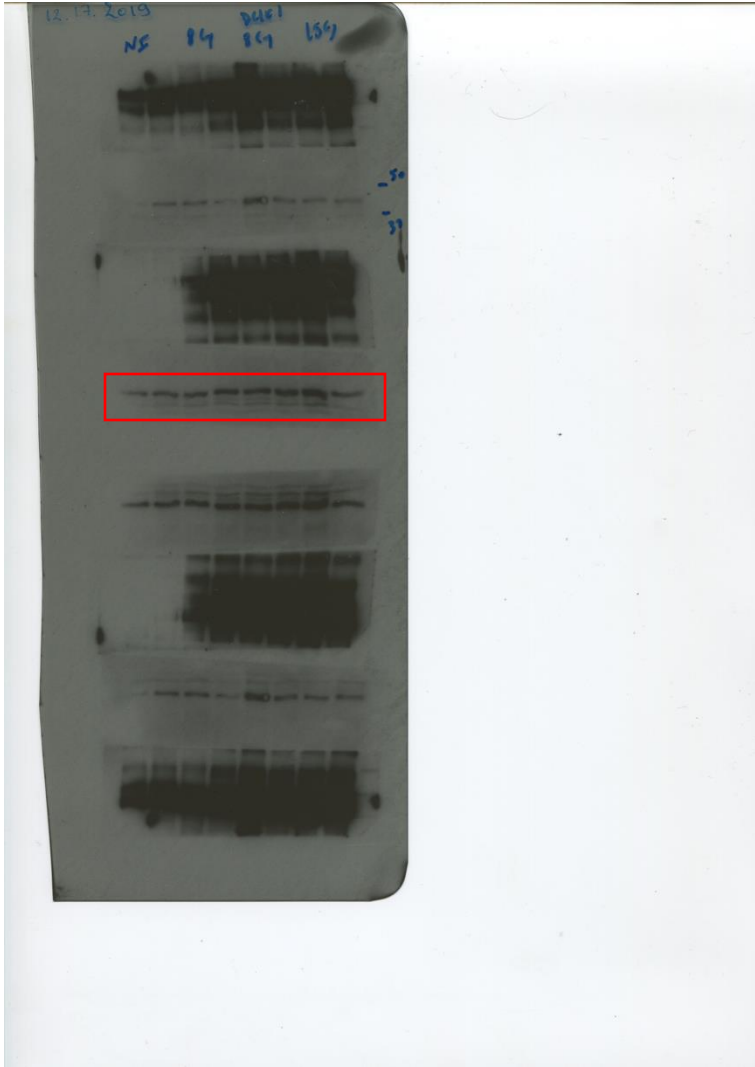

# Full uncropped gels for supplemental Figure 1C

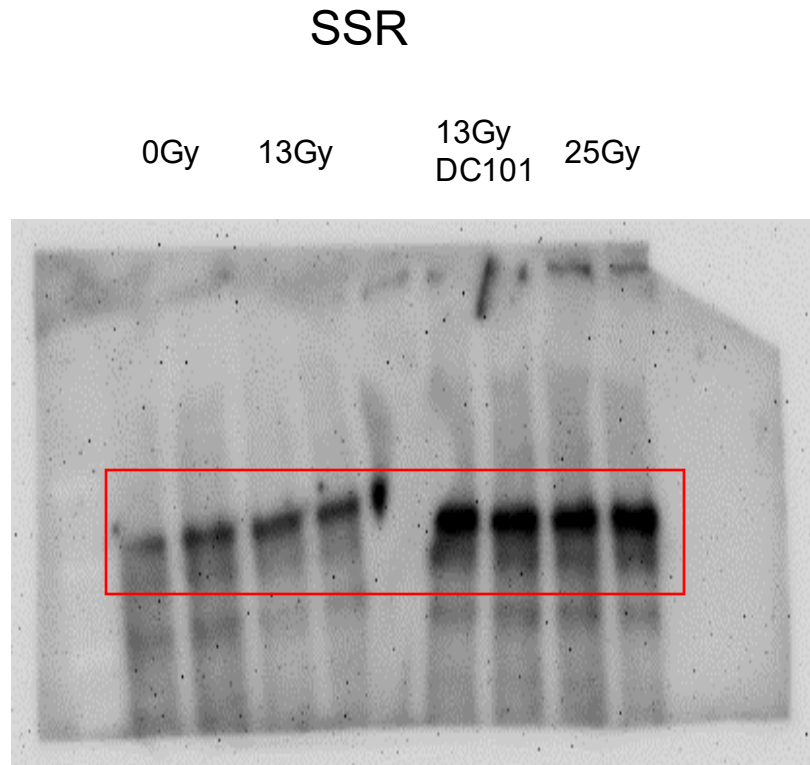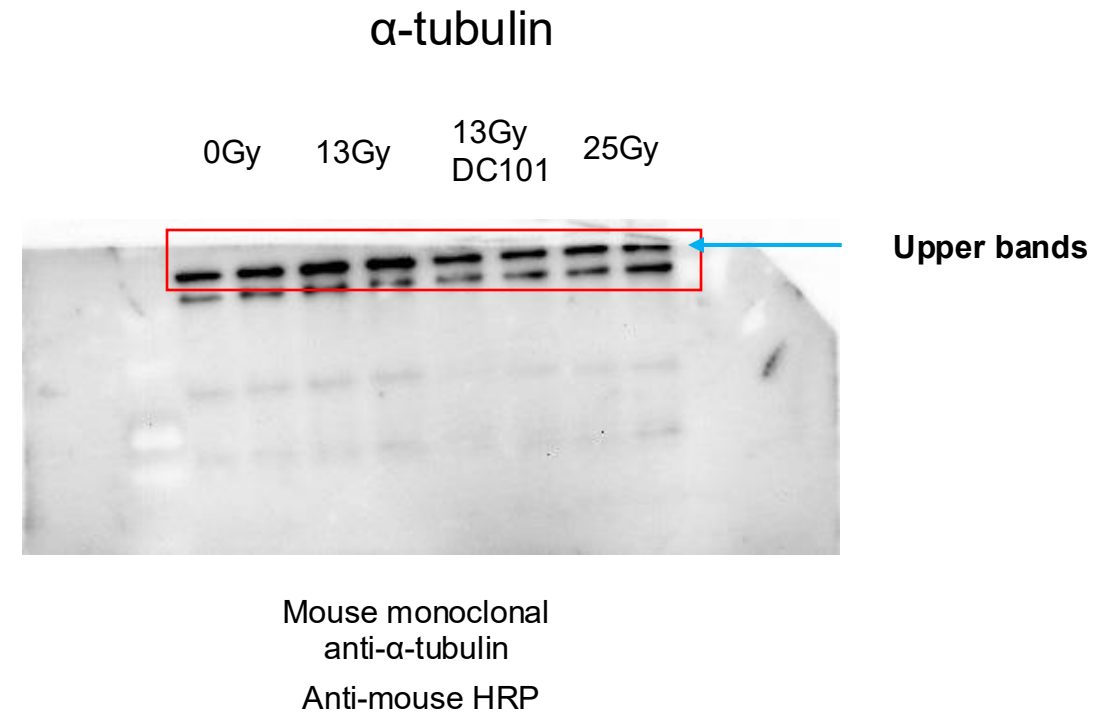

# Full uncropped gels for supplemental Figure 2A

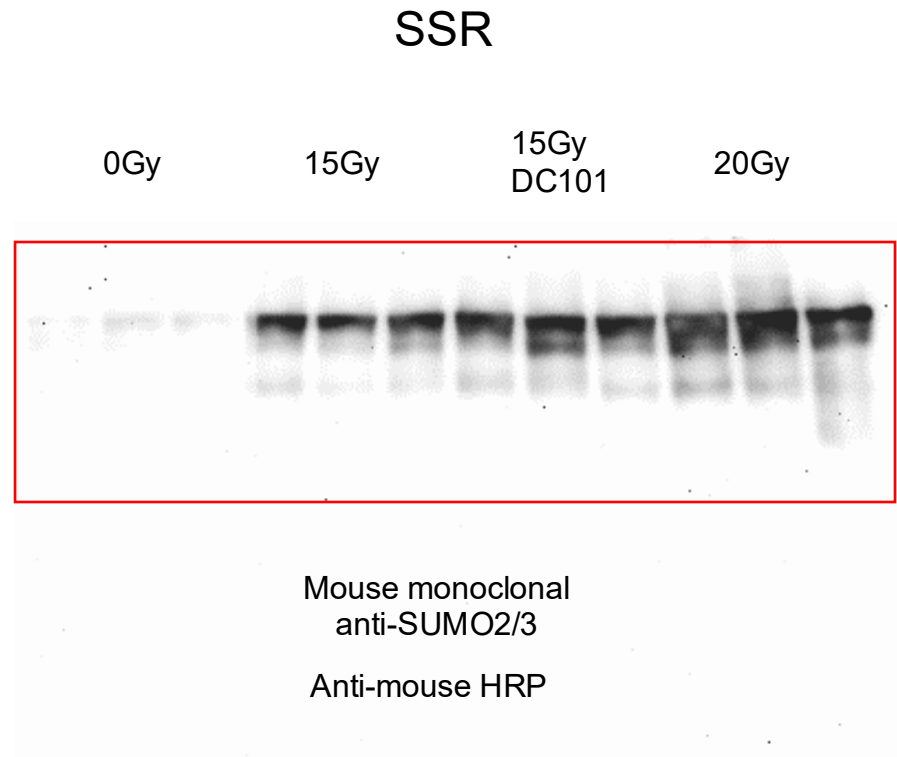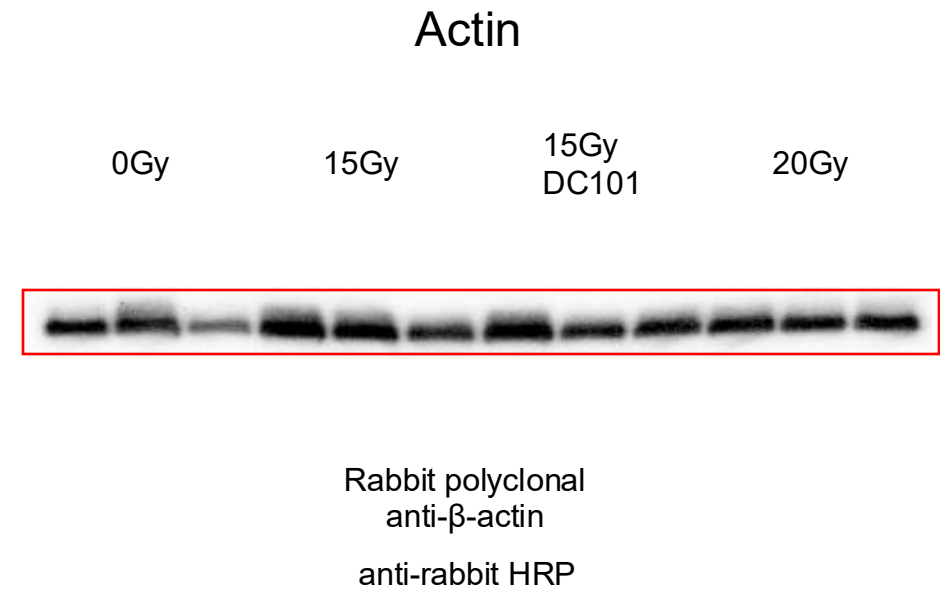

Supplement: sd2 [file 2]
